# Supplementary material
Source: publisher site journal article supplement (https://www.degruyter.com/publication/journal_key/JETL/downloadAsset/JETL_Annual%20Conference%20on%20European%20Tort%20Law%202020.pdf)
Supplement: Supplementary file 1 [file JETL_Annual%20Conference%20on%20European%20Tort%20Law%202020.pdf]

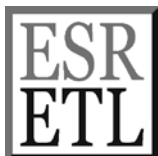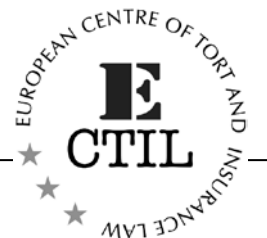

## 19th Annual Conference on European Tort Law (ACET)

From April 16 to April 18, 2020, the Institute for European Tort Law (ETL) and the European Centre of Tort and Insurance Law (ECTIL) will host the 19th Annual Conference on European Tort Law in Vienna. The Conference will highlight the main developments in tort law in Europe in 2019 and allow discussion of their implications.

On Thursday evening (April 16, 2020), the Conference will begin with an opening lecture by Michael Faure (Maastricht European Institute for Transnational Legal Research, Maastricht University), followed by a reception at the Austrian Supreme Court (Palace of Justice). On Friday (April 17, 2020), scholars from most EU Member States, plus Norway and Switzerland, will report on the latest developments in the field of tort law in their respective jurisdictions. A brief comparative overview of the principal themes to emerge and a presentation of developments at European Union level will also be provided.

The Conference will continue on Saturday morning (April 18, 2020) with a special session on 'Liability for Digital Technologies'. In this special session, chaired by Bernhard A. Koch (Innsbruck), the panelists will discuss the risks of emerging digital technologies such as artificial intelligence, robotics, or the Internet of Things. Speakers will examine whether existing liability regimes are suitable to cope with the specific challenges posed by such new technologies, to what extent adjustments are necessary, or whether entirely novel solutions are needed. Recent developments on the EU level will be addressed in particular, including the recently published outcomes of the Expert Group on Liability for New Technologies.

Revised and expanded reports on developments in each jurisdiction will be published in the Yearbook 'European Tort Law 2019'. Revised versions of the lectures from the Saturday morning session will be published as a special issue of the Journal of European Tort Law.

Conference fee: € 600 (including a copy of the 2019 Yearbook)

Early booking discount for registration by 4 March 2020: € 500

Supporting members: € 300 (including a copy of the 2019 Yearbook)

Early booking discount for registration by 4 March 2020: € 250

University staff, judges: € 120 (Conference only; Yearbook copy optional at approx. € 95)

Early booking discount for registration by 4 March 2020: € 100

Jurists in training: € 60 (Conference only; Yearbook copy optional at approx. € 95)

Early booking discount for registration by 4 March 2020: € 50

The fee includes the Conference materials, evening reception on Thursday, buffet lunch on Friday, and refreshments during the Conference.

### For further information and registration contact:

European Centre of Tort and Insurance Law (ECTIL)

Reichsratsstrasse 17/2, A-1010 Vienna, Austria

Tel. (0043 1) 4277 29650; Fax (0043 1) 4277 29670

Email [ectil@ectil.org](mailto:ectil@ectil.org)

<http://www.ectil.org>

Institute for European Tort Law (ETL)

Reichsratsstrasse 17/2, A-1010 Vienna, Austria

Tel. (0043 1) 4277 29651; Fax (0043 1) 4277 29670

Email [etl@oeaw.ac.at](mailto:etl@oeaw.ac.at)

<http://www.etl.oeaw.ac.at>
